# Supplementary material for: Chronological Profiling of Plasma Native Peptides after Hepatectomy in Pigs: Toward the Discovery of Human Biomarkers for Liver Regeneration
Source: PLoS One. 2017 Jan 6;12(1):e0167647. doi: 10.1371/journal.pone.0167647 (PMC5218562; doi:10.1371/journal.pone.0167647)
Supplement: S5 Table — The peaks at 2378 and 9080 m/z clearly discriminated 0 min, 24, 48, and 168 h with P-values of no more than 0.0001 in every 3 experiments. AveN indicated peak area/intensity average of class N (1 to 4). StdDevN indicated standard deviation of the peak area/intensity average of class N. Class 1, 2, 3, and 4 represented 0 min, 24, 48, and 168 h, respectively. The x and y axes of the 2-dimensional distribution plots represented 2378 and 9080 m/z, respectively. (XLSX) [file pone.0167647.s007.xlsx]

## Sheet: Sheet1
Mass (m/z)	P value	Ave1	Ave2	Ave3	Ave4	StdDev1	StdDev2	StdDev3	StdDev4
Experiment 1
2378	<0.000001	2.75	4.67	5.88	8.27	0.7	1.29	1.43	2.21
9080	<0.000001	2.96	1.88	1.24	1.25	0.72	0.55	0.54	0.34
Experiment 2
2378	<0.000001	4.88	7.95	7.74	13.57	1.52	3.47	1.95	2.56
9080	<0.000001	3.9	1.81	1.01	1.27	0.88	0.42	0.29	0.43
Experiment 3
2378	<0.000001	2.87	4.96	5.51	9.19	0.9	2.6	0.78	1.78
9080	<0.0001	3.41	1.44	1.38	1.91	0.87	0.7	0.41	1.41
	Experiment 1			Experiment 2			Experiment 3
